# Supplementary material
Source: MDPI journal article supplement (https://www.mdpi.com/2073-4441/10/6/697)
Supplement: s1 [file s1]

## Examples of discharge measurement summaries on the Sagavanirktok River, Alaska - USA

Location: DSS2 Channel 1

Date: 27/05/2017

| Tr.#        |   | Edge Distance |      | #Ens. | Discharge |        |        |       |       |       | Width | Area  | Time         |       | Mean Vel. |       | % Bad |      |
|-------------|---|---------------|------|-------|-----------|--------|--------|-------|-------|-------|-------|-------|--------------|-------|-----------|-------|-------|------|
|             |   | L             | R    |       | Top       | Middle | Bottom | Left  | Right | Total |       |       | Start        | End   | Boat      | Water | Ens.  | Bins |
| 000         | L | 1.00          | 3.00 | 195   | 39.6      | 349    | 61.4   | 0.144 | 0.217 | 450   | 122.1 | 238.7 | 12:17        | 12:19 | 1.06      | 1.89  | 2     | 0    |
| 001         | R | 1.00          | 1.00 | 135   | 38.1      | 348    | 56.7   | 0.378 | 0.053 | 443   | 115.2 | 224.4 | 12:19        | 12:21 | 1.45      | 1.98  | 13    | 0    |
| 002         | L | 1.00          | 1.00 | 139   | 38.6      | 348    | 60.2   | 0.177 | 0.073 | 447   | 118.1 | 239.4 | 12:21        | 12:23 | 1.40      | 1.87  | 4     | 0    |
| 003         | R | 1.00          | 2.00 | 123   | 39.7      | 370    | 67.0   | 0.222 | 0.341 | 477   | 108.0 | 217.3 | 12:24        | 12:25 | 1.53      | 2.20  | 1     | 0    |
| <b>Mean</b> |   | 1.00          | 1.75 | 148   | 39.0      | 354    | 61.3   | 0.230 | 0.171 | 454   | 115.9 | 229.9 | <b>Total</b> | 00:08 | 1.36      | 1.98  | 5     | 0    |
| <b>5Dev</b> |   | 0.00          | 0.96 | 32    | 0.762     | 10.8   | 4.24   | 0.104 | 0.135 | 15.4  | 5.9   | 10.9  |              |       | 0.21      | 0.15  |       |      |
| <b>5D/M</b> |   | 0.00          | 0.55 | 0.22  | 0.02      | 0.03   | 0.07   | 0.45  | 0.79  | 0.03  | 0.05  | 0.05  |              |       | 0.15      | 0.08  |       |      |

Location: DSS2 Channel 2

Date: 27/05/2017

| Tr.#        |   | Edge Distance |      | #Ens. | Discharge |        |        |       |       |       | Width | Area | Time         |       | Mean Vel. |       | % Bad |      |
|-------------|---|---------------|------|-------|-----------|--------|--------|-------|-------|-------|-------|------|--------------|-------|-----------|-------|-------|------|
|             |   | L             | R    |       | Top       | Middle | Bottom | Left  | Right | Total |       |      | Start        | End   | Boat      | Water | Ens.  | Bins |
| 004         | L | 2.00          | 5.00 | 94    | 6.68      | 11.3   | 2.18   | 0.042 | 0.171 | 20.3  | 45.6  | 21.2 | 12:28        | 12:29 | 0.92      | 0.96  | 4     | 0    |
| 005         | R | 1.00          | 3.00 | 93    | 6.43      | 11.5   | 2.71   | 0.275 | 0.054 | 21.0  | 45.9  | 21.4 | 12:29        | 12:30 | 0.83      | 0.98  | 19    | 0    |
| 006         | L | 3.00          | 3.00 | 94    | 5.84      | 11.1   | 2.26   | 0.870 | 0.064 | 20.1  | 42.4  | 19.1 | 12:31        | 12:32 | 0.83      | 1.05  | 9     | 0    |
| 007         | R | 2.00          | 8.00 | 105   | 6.18      | 11.0   | 2.19   | 0.168 | 0.137 | 19.7  | 45.3  | 19.0 | 12:33        | 12:34 | 0.83      | 1.04  | 7     | 0    |
| <b>Mean</b> |   | 2.00          | 4.75 | 96    | 6.28      | 11.2   | 2.34   | 0.339 | 0.107 | 20.3  | 44.8  | 20.2 | <b>Total</b> | 00:05 | 0.85      | 1.01  | 10    | 0    |
| <b>5Dev</b> |   | 0.82          | 2.36 | 6     | 0.358     | 0.222  | 0.251  | 0.367 | 0.057 | 0.534 | 1.6   | 1.3  |              |       | 0.04      | 0.05  |       |      |
| <b>5D/M</b> |   | 0.41          | 0.50 | 0.06  | 0.06      | 0.02   | 0.11   | 1.08  | 0.53  | 0.03  | 0.04  | 0.07 |              |       | 0.05      | 0.05  |       |      |

Location: DSS2 Channel 3

Date: 27/05/2017

| Tr.#        |   | Edge Distance |      | #Ens. | Discharge |        |        |       |       |       | Width | Area | Time         |       | Mean Vel. |       | % Bad |      |
|-------------|---|---------------|------|-------|-----------|--------|--------|-------|-------|-------|-------|------|--------------|-------|-----------|-------|-------|------|
|             |   | L             | R    |       | Top       | Middle | Bottom | Left  | Right | Total |       |      | Start        | End   | Boat      | Water | Ens.  | Bins |
| 008         | L | 8.00          | 10.0 | 112   | 20.3      | 38.8   | 11.3   | 0.663 | 0.991 | 72.1  | 92.4  | 44.2 | 12:36        | 12:37 | 1.17      | 1.63  | 6     | 0    |
| 009         | R | 10.0          | 12.0 | 128   | 20.1      | 35.2   | 11.9   | 0.899 | 1.56  | 69.7  | 93.1  | 42.5 | 12:37        | 12:39 | 0.97      | 1.64  | 2     | 0    |
| 010         | L | 10.0          | 15.0 | 103   | 18.8      | 36.9   | 10.5   | 0.737 | 1.80  | 68.7  | 99.1  | 45.0 | 12:39        | 12:40 | 1.26      | 1.53  | 3     | 0    |
| 011         | R | 10.0          | 12.0 | 118   | 20.1      | 36.7   | 10.6   | 0.779 | 1.49  | 69.6  | 90.2  | 41.3 | 12:40        | 12:41 | 1.04      | 1.69  | 3     | 0    |
| <b>Mean</b> |   | 9.50          | 12.3 | 115   | 19.9      | 36.9   | 11.1   | 0.770 | 1.46  | 70.0  | 93.7  | 43.2 | <b>Total</b> | 00:05 | 1.11      | 1.62  | 4     | 0    |
| <b>5Dev</b> |   | 1.00          | 2.06 | 11    | 0.683     | 1.45   | 0.670  | 0.099 | 0.342 | 1.43  | 3.8   | 1.6  |              |       | 0.13      | 0.07  |       |      |
| <b>5D/M</b> |   | 0.11          | 0.17 | 0.09  | 0.03      | 0.04   | 0.06   | 0.13  | 0.23  | 0.02  | 0.04  | 0.04 |              |       | 0.12      | 0.04  |       |      |

Location: MP387 Channel 1

Date: 31/05/2017

| Tr.#        |   | Edge Distance |      | #Ens. | Discharge |        |        |       |       |       | Width | Area  | Time         |       | Mean Vel. |       | % Bad |      |
|-------------|---|---------------|------|-------|-----------|--------|--------|-------|-------|-------|-------|-------|--------------|-------|-----------|-------|-------|------|
|             |   | L             | R    |       | Top       | Middle | Bottom | Left  | Right | Total |       |       | Start        | End   | Boat      | Water | Ens.  | Bins |
| 000         | L | 8.00          | 5.00 | 216   | 37.8      | 123    | 23.3   | 1.03  | 0.426 | 186   | 158.6 | 125.5 | 15:20        | 15:22 | 1.11      | 1.48  | 2     | 0    |
| 001         | R | 5.00          | 5.00 | 238   | 36.0      | 116    | 22.0   | 0.201 | 0.408 | 175   | 155.9 | 123.1 | 15:22        | 15:25 | 1.04      | 1.42  | 3     | 0    |
| 002         | L | 5.00          | 5.00 | 169   | 35.5      | 114    | 21.3   | 0.301 | 0.364 | 172   | 157.8 | 126.2 | 15:25        | 15:27 | 1.42      | 1.36  | 1     | 0    |
| 003         | R | 7.00          | 5.00 | 203   | 35.1      | 126    | 22.2   | 0.582 | 0.272 | 184   | 157.2 | 131.4 | 15:27        | 15:29 | 1.11      | 1.40  | 0     | 0    |
| <b>Mean</b> |   | 6.25          | 5.00 | 206   | 36.1      | 120    | 22.2   | 0.529 | 0.368 | 179   | 157.4 | 126.5 | <b>Total</b> | 00:09 | 1.17      | 1.42  | 2     | 0    |
| <b>5Dev</b> |   | 1.50          | 0.00 | 29    | 1.21      | 5.35   | 0.829  | 0.371 | 0.069 | 6.64  | 1.1   | 3.5   |              |       | 0.17      | 0.05  |       |      |
| <b>5D/M</b> |   | 0.24          | 0.00 | 0.14  | 0.03      | 0.04   | 0.04   | 0.70  | 0.19  | 0.04  | 0.01  | 0.03  |              |       | 0.14      | 0.03  |       |      |

Location: MP387 Channel 2

Date: 31/05/2017

| Tr.#        |   | Edge Distance |      | #Ens. | MBT Corrected Discharge |        |        |       |       |       | Width | Area | Time         |       | Mean Vel. |       | % Bad |      |
|-------------|---|---------------|------|-------|-------------------------|--------|--------|-------|-------|-------|-------|------|--------------|-------|-----------|-------|-------|------|
|             |   | L             | R    |       | Top                     | Middle | Bottom | Left  | Right | Total |       |      | Start        | End   | Boat      | Water | Ens.  | Bins |
| 004         | R | 3.00          | 2.00 | 95    | 4.01                    | 7.87   | 1.48   | 0.356 | 0.203 | 13.9  | 23.6  | 11.9 | 15:33        | 15:34 | 0.41      | 1.17  | 0     | 0    |
| <b>Mean</b> |   | 3.00          | 2.00 | 95    | 4.01                    | 7.87   | 1.48   | 0.356 | 0.203 | 13.9  | 23.6  | 11.9 | <b>Total</b> | 00:00 | 0.41      | 1.17  | 0     | 0    |
| <b>5Dev</b> |   |               |      |       |                         |        |        |       |       |       |       |      |              |       |           |       |       |      |
| <b>5D/M</b> |   |               |      |       |                         |        |        |       |       |       |       |      |              |       |           |       |       |      |

Location: MP387 Channel 3

Date: 31/05/2017

| Tr.#        |   | Edge Distance |      | #Ens. | MBT Corrected Discharge |        |        |       |       |       | Width | Area  | Time         |       | Mean Vel. |       | % Bad |      |
|-------------|---|---------------|------|-------|-------------------------|--------|--------|-------|-------|-------|-------|-------|--------------|-------|-----------|-------|-------|------|
|             |   | L             | R    |       | Top                     | Middle | Bottom | Left  | Right | Total |       |       | Start        | End   | Boat      | Water | Ens.  | Bins |
| 005         | L | 8.00          | 3.00 | 227   | 59.2                    | 333    | 56.7   | 0.430 | 0.598 | 450   | 185.8 | 221.4 | 15:37        | 15:40 | 1.35      | 2.03  | 1     | 0    |
| 006         | R | 8.00          | 1.00 | 281   | 56.9                    | 337    | 54.9   | 0.523 | 0.054 | 450   | 187.5 | 228.8 | 15:40        | 15:43 | 1.30      | 1.97  | 2     | 0    |
| 007         | L | 8.00          | 1.00 | 251   | 57.9                    | 332    | 55.2   | 0.431 | 0.216 | 446   | 181.1 | 220.5 | 15:43        | 15:46 | 1.18      | 2.02  | 0     | 0    |
| 009         | R | 8.00          | 1.00 | 310   | 57.5                    | 336    | 54.3   | 0.476 | 0.036 | 448   | 184.3 | 220.8 | 15:47        | 15:51 | 1.07      | 2.03  | 1     | 0    |
| <b>Mean</b> |   | 8.00          | 1.50 | 267   | 57.9                    | 335    | 55.3   | 0.465 | 0.226 | 448   | 184.7 | 222.9 | <b>Total</b> | 00:14 | 1.23      | 2.01  | 1     | 0    |
| <b>5Dev</b> |   | 0.00          | 1.00 | 36    | 0.978                   | 2.37   | 1.01   | 0.044 | 0.261 | 2.10  | 2.7   | 4.0   |              |       | 0.13      | 0.03  |       |      |
| <b>5D/M</b> |   | 0.00          | 0.67 | 0.14  | 0.02                    | 0.01   | 0.02   | 0.10  | 1.15  | 0.00  | 0.01  | 0.02  |              |       | 0.10      | 0.02  |       |      |

Location: DSS1

Date: 26/05/2017

| Tr.# |   | Edge Distance |      | #Ens. | Discharge |        |        |       |       |       | Width | Area  | Time  |       | Mean Vel. |       | % Bad |      |
|------|---|---------------|------|-------|-----------|--------|--------|-------|-------|-------|-------|-------|-------|-------|-----------|-------|-------|------|
|      |   | L             | R    |       | Top       | Middle | Bottom | Left  | Right | Total |       |       | Start | End   | Boat      | Water | Ens.  | Bins |
| 000  | L | 3.00          | 1.00 | 254   | 49.1      | 239    | 44.7   | 0.603 | 0.164 | 334   | 300.9 | 327.2 | 21:44 | 21:47 | 1.78      | 1.02  | 7     | 0    |
| 001  | R | 2.00          | 1.00 | 249   | 51.0      | 246    | 39.7   | 0.172 | 0.523 | 338   | 319.6 | 345.8 | 21:47 | 21:50 | 1.92      | 0.98  | 12    | 0    |
| 002  | L | 2.00          | 2.00 | 196   | 45.0      | 234    | 41.6   | 0.150 | 0.442 | 321   | 295.9 | 324.3 | 21:51 | 21:53 | 2.33      | 0.99  | 6     | 1    |
| 003  | R | 2.00          | 2.00 | 251   | 49.1      | 245    | 41.0   | 0.204 | 0.189 | 335   | 296.5 | 329.0 | 21:53 | 21:56 | 1.91      | 1.02  | 10    | 0    |
| Mean |   | 2.25          | 1.50 | 237   | 48.6      | 241    | 41.8   | 0.282 | 0.330 | 332   | 303.2 | 331.6 | Total | 00:11 | 1.99      | 1.00  | 9     | 1    |
| 5Dev |   | 0.50          | 0.58 | 28    | 2.50      | 5.62   | 2.10   | 0.215 | 0.180 | 7.33  | 11.2  | 9.6   |       |       | 0.23      | 0.02  |       |      |
| 5D/M |   | 0.22          | 0.38 | 0.12  | 0.05      | 0.02   | 0.05   | 0.76  | 0.55  | 0.02  | 0.04  | 0.03  |       |       | 0.12      | 0.02  |       |      |
